# Supplementary material for: SIRT3 Acts as a Positive Autophagy Regulator to Promote Lipid Mobilization in Adipocytes via Activating AMPK
Source: Int J Mol Sci. 2020 Jan 7;21(2):372. doi: 10.3390/ijms21020372 (PMC7013837; doi:10.3390/ijms21020372)
Supplement: Supplementary file 1 [file ijms-21-00372-s001.pdf]

# Supplementary Information

## **SIRT3 acts as a positive autophagy regulator to promote lipid mobilization in adipocytes via activating AMPK**

**Tian Zhang<sup>1</sup>, Jingxin Liu<sup>1</sup>, Qiang Tong<sup>2</sup>, Ligen Lin<sup>1,\*</sup>**

<sup>1</sup> State Key Laboratory of Quality Research in Chinese Medicine, Institute of Chinese Medical Sciences, University of Macau, Macau, China; yb67520@um.edu.mo (T.Z.); jingxinliu@vip.sina.com (J.L.)

<sup>2</sup> Children's Nutrition Research Center, Baylor College of Medicine, Houston, Texas, United States of America; qtong@bcm.edu

\* Correspondence: ligenl@um.edu.mo; Address: 6044 Research Building N22, University of Macau, Avenida da Universidade, Taipa, Macau 999078, China; Tel.: +853-88228041 (L.L.)

**Supplementary Table S1** siRNA sequence used in the current study.

| siRNA target                    | Sense                  | Anti-sense             | Catalog No. |
|---------------------------------|------------------------|------------------------|-------------|
| <i>Atg5</i>                     | GCUACCCAGAUAAACUUUCUTT | AGAAAGUUAUCUGGGUAGCTT  | #1080       |
| <i>LAMP-2A</i>                  | GCCGUUCAGUCCAAUGCAUTT  | AUGCAUUGGACUGAACGGCTT  | #215        |
| <i>AMPK<math>\alpha</math>1</i> | GCCGACCCAAUGAUAUCAUTT  | AUGAUAUCAUUGGGUCGGCTT  | #1250       |
| <i>AMPK<math>\alpha</math>2</i> | GCAGUGGCUUAUCAUCUUATT  | UAAGAUGAUAAAGCCACUGCTT | #1059       |
| <i>AMPK<math>\beta</math>1</i>  | GCCAGCUUGGCACAGUUAATT  | UUAACUGUGCCAAGCUGGCTT  | #610        |
| <i>AMPK<math>\beta</math>2</i>  | CCAGUCAGCUUGGAACAAUTT  | AUUGUCCAAGCUGACUGGTT   | #608        |

**Supplementary Table S2** Antibodies used for Western blots.

| Antibody                         | Source | Vendor                    | Catalog No. |
|----------------------------------|--------|---------------------------|-------------|
| acetylated- lysine               | Mouse  | Protein Technology        | #9441       |
| AMPK $\alpha$                    | Rabbit | Cell Signaling Technology | #2532       |
| AMPK $\alpha$ 1                  | Rabbit | Cell Signaling Technology | #5832       |
| AMPK $\alpha$ 2                  | Rabbit | Cell Signaling Technology | #2757       |
| AMPK $\beta$ 1                   | Rabbit | Cell Signaling Technology | #12036      |
| AMPK $\beta$ 2                   | Rabbit | Cell Signaling Technology | #4148       |
| <i>p</i> -AMPK $\alpha$ (Thr172) | Rabbit | Cell Signaling Technology | #50081      |
| Atg5                             | Rabbit | Cell Signaling Technology | #12994      |
| Beclin1                          | Rabbit | Cell Signaling Technology | #3495       |
| HSC70                            | Mouse  | Cell Signaling Technology | 10654-1-AP  |
| LAMP-2A                          | Rabbit | Cell Signaling Technology | 10397-1-AP  |
| LC3                              | Rabbit | Cell Signaling Technology | #12741      |
| PLIN1                            | Mouse  | Cell Signaling Technology | #9349       |
| p62                              | Rabbit | Sigma-Aldrich             | P0067       |
| SIRT3                            | Rabbit | Protein Technology        | 10099-1-AP  |
| ULK1                             | Rabbit | Cell Signaling Technology | #8054       |
| <i>p</i> -ULK1 (Ser555)          | Rabbit | Cell Signaling Technology | #5869       |
| GAPDH                            | Rabbit | Santa Cruz Biotechnology  | sc-25778    |

# Supplemental Fig. S1

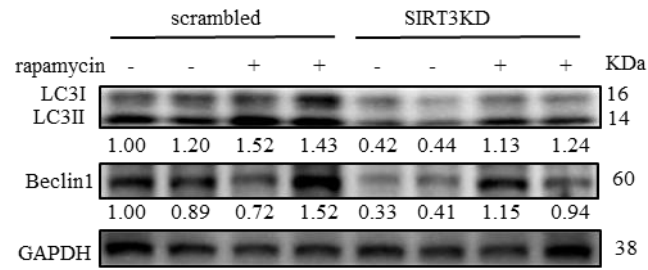

**Supplemental Fig. S1.** SIRT3KD and scrambled 3T3-L1 cells were treated with or without rapamycin for 16 h. Expression of autophagy related proteins was analyzed by Western blots. GAPDH was used as a loading control.

## Supplemental Fig. S2

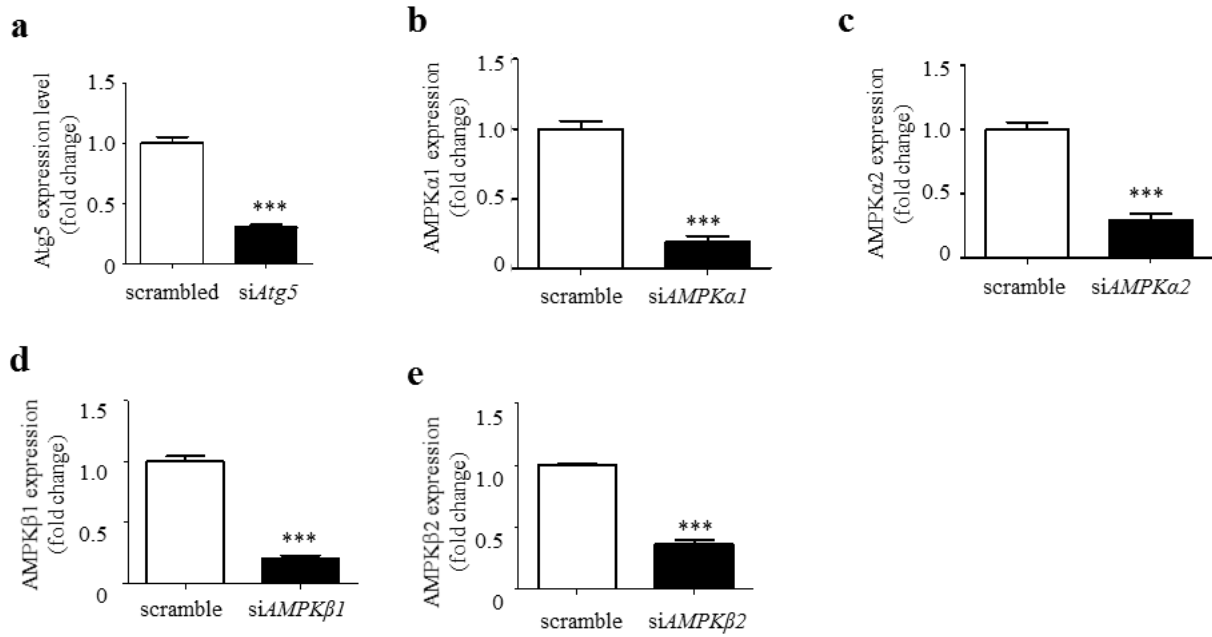

**Supplemental Fig. S2.** (a) Quantitation of Atg5 protein expression in scrambled and siAtg5 cells. Data represented means  $\pm$  S.D.,  $n = 6$ . \*\*\* $P < 0.001$  scrambled versus siAtg5 cells. (b) Quantitation of AMPK $\alpha$ 1 protein expression in scrambled and siAMPK $\alpha$ 1 cells. Data represented means  $\pm$  S.D.,  $n = 6$ . \*\*\* $P < 0.001$  scrambled versus siAMPK $\alpha$ 1 cells. (c) Quantitation of AMPK $\alpha$ 2 protein expression in scrambled and siAMPK $\alpha$ 2 cells. Data represented means  $\pm$  S.D.,  $n = 6$ . \*\*\* $P < 0.001$  scrambled versus siAMPK $\alpha$ 2 cells. (d) Quantitation of AMPK $\beta$ 1 protein expression in scrambled and siAMPK $\beta$ 1 cells. Data represented means  $\pm$  S.D.,  $n = 6$ . \*\*\* $P < 0.001$  scrambled versus siAMPK $\beta$ 1 cells. (e) Quantitation of AMPK $\beta$ 2 protein expression in scrambled and siAMPK $\beta$ 2 cells. Data represented means  $\pm$  S.D.,  $n = 6$ . \*\*\* $P < 0.001$  scrambled versus siAMPK $\beta$ 2 cells.

# Supplemental Fig. S3

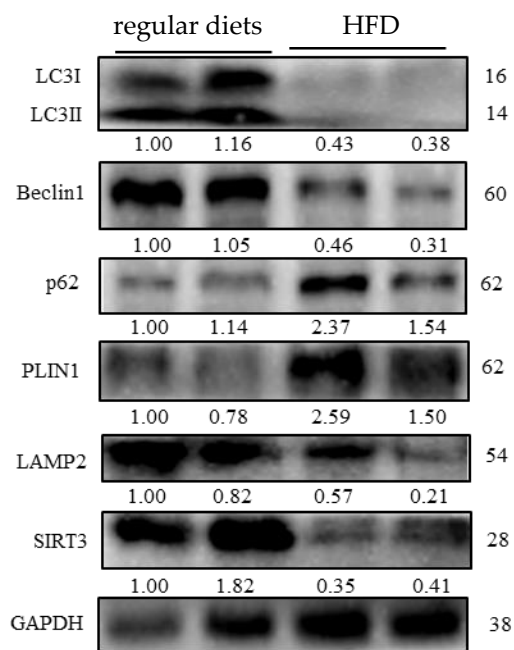

**Supplemental Fig. S3.** The expression of LC3, Beclin1, p62, PLIN1 and LAMP2A in epididymal WAT from regular diet- and HFD-fed mice. GAPDH was used as a loading control.

## Supplemental Fig. S4

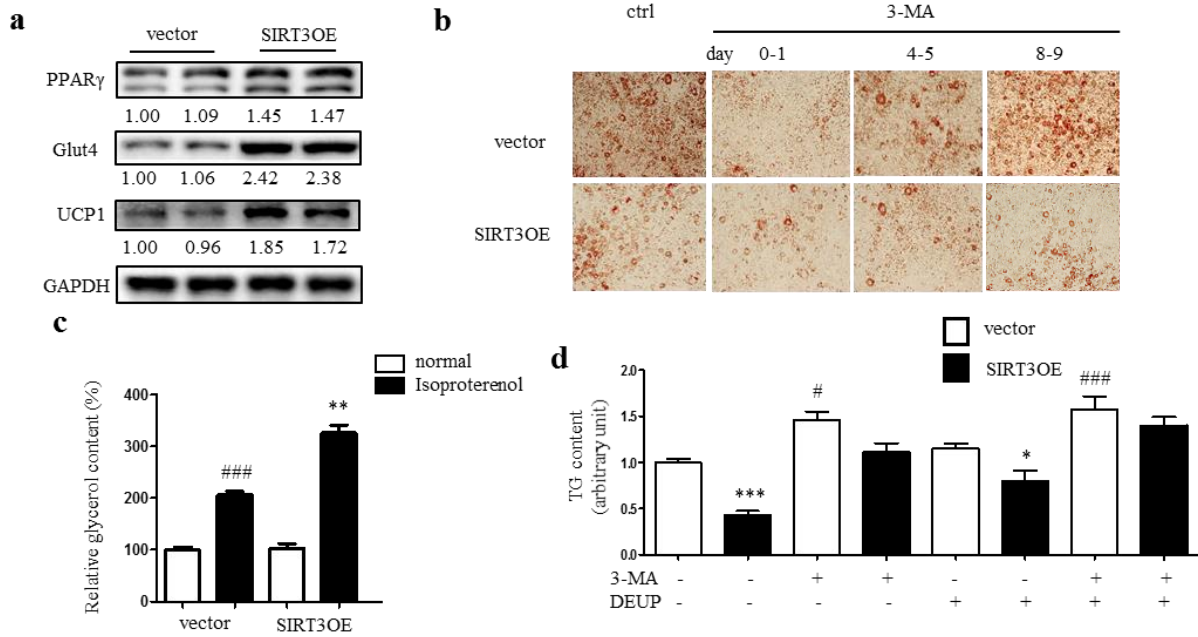

**Supplemental Fig. S4.** (a) The expression of PPAR $\gamma$ , GLUT4 and UCP1 in SIRT3OE and vector cells. (b) The vector and SIRT3OE adipocytes were treated with DMSO (ctrl) or 3-MA (at day 0, 6, and 8, respectively) for 24 h. Oil Red O staining was performed on day 10 post differentiation. (c) Relative glycerol content in vector and SIRT3OE adipocytes under both normal and isoproterenol-induced conditions. White: normal; black: isoproterenol. \*\* $P < 0.01$ , vector versus SIRT3OE cells; ### $P < 0.001$  normal versus isoproterenol treatment. (d) TG content in vector and SIRT3OE adipocytes. After fully differentiation, cells were treated with DMSO (vehicle control), 3-MA, DEUP, or combination of 3-MA and DEUP for 24 h. \* $P < 0.05$  and \*\*\* $P < 0.001$  vector versus SIRT3OE cells; # $P < 0.05$  and ### $P < 0.001$  vehicle versus treated cells. Data represented means  $\pm$  S.D.,  $n = 6$ .

## Supplemental Fig. S5

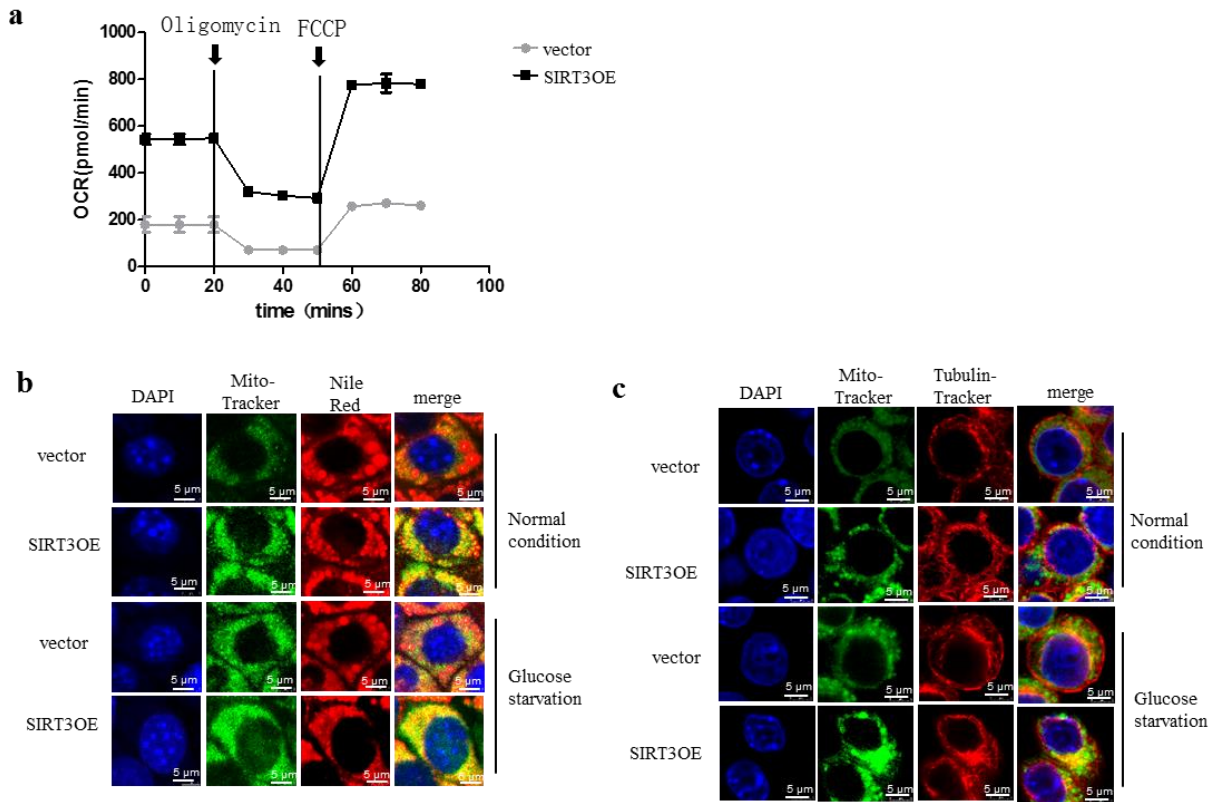

**Supplemental Fig. S5** SIRT3 promotes LD-mitochondria interaction with detyrosinated microtubules under nutrient starvation. (a) OCR of vector and SIRT3OE cells under baseline and oligomycin and FCCP induction condition. (b) Confocal images of vector and SIRT3OE cells under normal condition or glucose starvation status. Nile red (red) and mitotracker (green). Scale bar = 5  $\mu$ m. (c) Confocal images of vector and SIRT3OE cells under normal condition or glucose starvation status. Mitotracker (green) and tubulin Tracker (red). Scale bar = 5  $\mu$ m.
